# Supplementary material for: Optical DNA Mapping Combined with Cas9-Targeted Resistance Gene Identification for Rapid Tracking of Resistance Plasmids in a Neonatal Intensive Care Unit Outbreak
Source: PubMed Central journal article supplement (PMC6747713; doi:10.1128/mbio.00347-19), 2019-07-09
Supplement: mBio.00347-19-sf001.pdf [file mBio.00347-19-sf001.pdf]

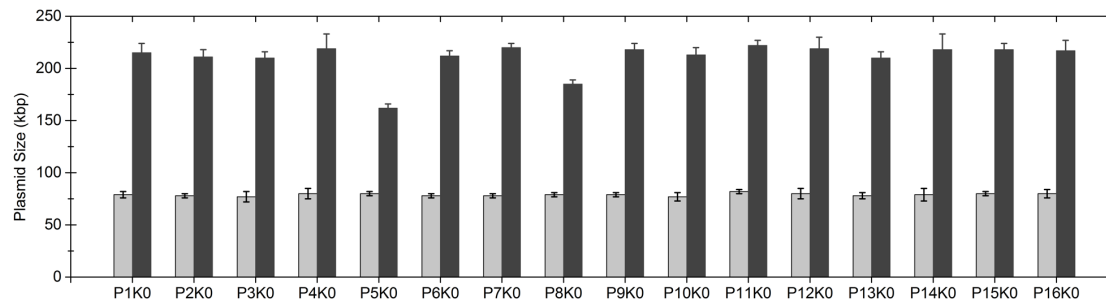

**Figure S1.** Sizes of plasmids in the ESBL-KP isolates at the start of the outbreak. The light grey bar represents the shorter shared plasmid and the dark grey bar represents larger shared plasmid.
