# Supplementary material for: Optical DNA Mapping Combined with Cas9-Targeted Resistance Gene Identification for Rapid Tracking of Resistance Plasmids in a Neonatal Intensive Care Unit Outbreak
Source: PubMed Central journal article supplement (PMC6747713; doi:10.1128/mbio.00347-19), 2019-07-09
Supplement: mBio.00347-19-sf005.pdf [file mBio.00347-19-sf005.pdf]

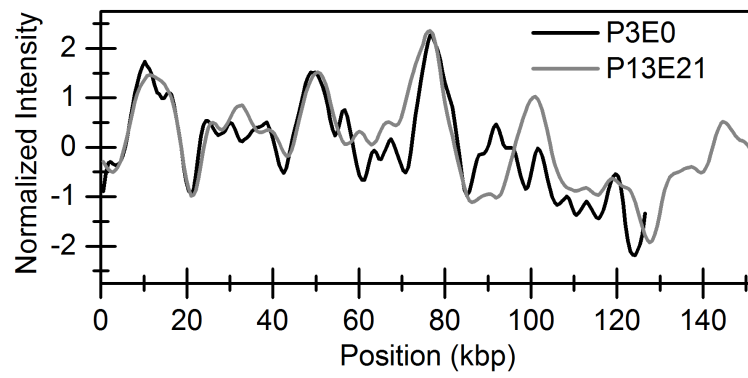

**Figure S5.** Similarity plot for 130 kbp plasmid in P3E0 and 152 kbp plasmid in P13E21.
