# Supplementary material for: Optical DNA Mapping Combined with Cas9-Targeted Resistance Gene Identification for Rapid Tracking of Resistance Plasmids in a Neonatal Intensive Care Unit Outbreak
Source: PubMed Central journal article supplement (PMC6747713; doi:10.1128/mbio.00347-19), 2019-07-09
Supplement: mBio.00347-19-st001.pdf [file mBio.00347-19-st001.pdf]

**Table S1.** Primers for PCR analysis of the deletions in the 220 kb plasmids

| Strain       | Primer | Sequence (5' → 3')    |
|--------------|--------|-----------------------|
| P3K0         | P6F    | ATCCATGGTGAGCATAGAAAC |
|              | P14R   | TAGTATCGCGAACCTCTT    |
| P5K0         | P7F-4  | CATTTGTGCTGCACGAGTAC  |
|              | P8R    | ATAGGGCGGAATACACCTTG  |
| P6K21        | P1F    | CCAGCAAGCTAGGCAACATG  |
| P8K0<br>P8K6 | P3R    | GTCTGCTTATCGCTCACAAC  |
