# Supplementary material for: Optical DNA Mapping Combined with Cas9-Targeted Resistance Gene Identification for Rapid Tracking of Resistance Plasmids in a Neonatal Intensive Care Unit Outbreak
Source: PubMed Central journal article supplement (PMC6747713; doi:10.1128/mbio.00347-19), 2019-07-09
Supplement: mBio.00347-19-st002.pdf [file mBio.00347-19-st002.pdf]

**Table S2.** Statistical confirmation of Cas9 cut position for all EP-K ST101 80 kb plasmids.

| Patient No | Cut Position (kbp)   | No. of cuts at specific position | No. of cuts at random position | Maximum No. of cuts at specific position in a random case |
|------------|----------------------|----------------------------------|--------------------------------|-----------------------------------------------------------|
| P1K0       | 57.5                 | 19                               | 1                              | $3.3 \pm 0.7$                                             |
| P1K12      | 57.6                 | 13                               | 3                              | $2.7 \pm 0.65$                                            |
| P2K0       | 56.5                 | 07                               | 0                              | $1.8 \pm 0.56$                                            |
| P3K0       | 56                   | 18                               | 0                              | $3.1 \pm 0.7$                                             |
| P3K23      | 56                   | 18                               | 0                              | $3.1 \pm 0.68$                                            |
| P4K0       | 57                   | 21                               | 0                              | $3.5 \pm 0.7$                                             |
| P4K14      | 55.2                 | 4                                | 1                              | $1.5 \pm 0.55$                                            |
| P5K0       | 56.1                 | 25                               | 0                              | $3.7 \pm 0.7$                                             |
| P6K0       | 56.9                 | 22                               | 0                              | $3.5 \pm 0.72$                                            |
| P6K21      | 56.8                 | 21                               | 0                              | $3.4 \pm 0.71$                                            |
| P7K0       | 56.4                 | 12                               | 0                              | $2.5 \pm 0.6$                                             |
| P8K0       | 58.3                 | 19                               | 1                              | $3.3 \pm 0.68$                                            |
| P8K6       | 56.1                 | 15                               | 0                              | $2.5 \pm 0.62$                                            |
| P9K0       | 56.9                 | 08                               | 1                              | $2.2 \pm 0.54$                                            |
| P10K0      | 57                   | 20                               | 0                              | $3.4 \pm 0.72$                                            |
| P11K0      | 57.2                 | 19                               | 0                              | $3.2 \pm 0.68$                                            |
| P11K22     | 56.1                 | 19                               | 2                              | $3.3 \pm 0.69$                                            |
| P12K0      | 57.4                 | 21                               | 0                              | $3.5 \pm 0.73$                                            |
| P13K0      | 56.4                 | 11                               | 1                              | $2.5 \pm 0.6$                                             |
| P13K9      | No Cas9 cut detected |                                  |                                |                                                           |
| P14K0      | 56.6                 | 9                                | 1                              | $2.3 \pm 0.5$                                             |
| P15K0      | 56.5                 | 20                               | 0                              | $3.3 \pm 0.7$                                             |
| P16K0      | 56.7                 | 08                               | 4                              | $2.6 \pm 0.64$                                            |
