# Supplementary material for: Optical DNA Mapping Combined with Cas9-Targeted Resistance Gene Identification for Rapid Tracking of Resistance Plasmids in a Neonatal Intensive Care Unit Outbreak
Source: PubMed Central journal article supplement (PMC6747713; doi:10.1128/mbio.00347-19), 2019-07-09
Supplement: mBio.00347-19-st003.pdf [file mBio.00347-19-st003.pdf]

**Table S3.** Descriptions of plasmid sequences from whole genome sequencing.

| Isolate | Location   | Size (bp) | MLST  | Replicon <sup>a</sup>       | Best match in GenBank<br>(% identity/% query coverage)        | Resistance gene/s <sup>b</sup>                                                                                                                  | Virulence genes/ <sup>c</sup>                                    |
|---------|------------|-----------|-------|-----------------------------|---------------------------------------------------------------|-------------------------------------------------------------------------------------------------------------------------------------------------|------------------------------------------------------------------|
| P1K0    |            | 215 872   |       | IncFIB <sub>K</sub> /IncFII | p69-1 (CP025457.1)<br>(99/99)                                 | <i>arsA-D, cop</i> -operon                                                                                                                      | <i>urtA-urtE, amiF</i>                                           |
|         |            | 80 272    |       | IncR/IncFIA                 | AR_0049 plasmid<br>unitig_3 (CP018819.1)<br>(81/99)           | <i>bla</i> <sub>TEM-1A</sub> , <i>bla</i> <sub>CTX-M-15</sub> ,<br><i>qnrB1, sul2, aac(3)-IId, aph(6)-Id, dfrA14, aph(3'')-Ib</i>               | None                                                             |
|         |            | 4 572     |       | ColRNAI                     | pJHCMW1<br>(AF479774.1)<br>(58/92)                            | None                                                                                                                                            | None                                                             |
|         |            | 4 163     |       | ColRNAI                     | FDAARGOS_446<br>plasmid unnamed3<br>(CP023945.1)<br>(100/100) | None                                                                                                                                            | None                                                             |
|         | Chromosome | 5 277 535 | ST101 |                             | ND                                                            | <i>bla</i> <sub>SHV-1</sub> , <i>oqxA, oqxB</i>                                                                                                 | ND                                                               |
| P3E6    |            | 129 195   |       | IncFIB/ IncFII              | pAA-ST131 plasmid<br>ESBL20150001<br>(KY706108.1)<br>(93/99)  | None                                                                                                                                            | <i>safC, afaB, afaD, aggR, agg5A, ORF3, ORF4, aap, aar, aatA</i> |
|         |            | 5 878     |       | ColRNAI                     | pSL491_5 (CP001148.1)<br>(100/97)                             | None                                                                                                                                            | None                                                             |
|         | Chromosome | 5 425 761 | ST38  |                             | ND                                                            | <i>bla</i> <sub>TEM-1B</sub> , <i>bla</i> <sub>CTX-M-15</sub> ,<br><i>sul2, aac(3)-IIa, aph(6)-Id, dfrA1, aph(3'')-Ib, tet(D), catA1, aadA1</i> | ND                                                               |
